# Supplementary material for: How much time and who will do it? Organizing the toolbox of climate adaptations for small-scale fisheries
Source: Frontiers journal article supplement (doi:10.3389/fmars.2025.1521526), 2025-03-11
Supplement: Data_Sheet_1.xlsx [file Data_Sheet_1.xlsx]

## Sheet: Sheet1
Table S1. List of the locations of the case studies used to gather the adaptation strategies and their sources.
The numbers correspond to the numbers on the outside of the circle displayed on the map in Fig. 1.
The total at the end of the category columns corresponds with the amount of sources/references that specified a adaptation strategy from each of the categories.
	No.	Reference	Location	Institu- tional	Commu- nication	Science	Risk Resilience	Liveli- hood
	1	Allison et al., 2009	Global
	2	IFAD, 2014	Global
	3	Galappaththi et al., 2021	Global
	4	León et al., 2006	Global
	5	Islam & Chuenpagdee, 2022	Global
	6	FAO, 2018	Global
	7	Berkes & Armitage, 2010	Arctic
	8	Islam et al., 2014	Bangladesh
	9	Deb & Haque, 2016	Bangladesh
	10	Hasan & Nursey-Bray, 2018	Bangladesh
	11	Kalikoski et al., 2010	Brazil
	12	Leite et al., 2019	Brazil
	13	Haque et al., 2015	Brazil
	14	GIZ, 2019	Caribbean
	15	Payne et al., 2021	EU
	16	Prosperi et al., 2019	EU
	17	Monnier et al., 2020	Galapagos Islands
	18	Mabe & Asase, 2020	Ghana
	19	Senapati & Gupta, 2017	India
	20	Salagrama, 2012	India
	21	Coulthard, 2008	India
	22	Iwasaki et al., 2009	India
	23	Fauzi & Anna, 2010	Indonesia
	24	Yuerlita et al., 2013	Indonesia
	25	Shaffril, Abu Samah, et al., 2017	Malaysia
	26	Abu Samah et al., 2019	Malaysia
	27	Shaffril, Hamzah, et al., 2017	Malaysia
	28	Abu Samah et al., 2016	Malaysia
	29	Muhammad et al., 2016	Malaysia
	30	Shaffril et al., 2013	Malaysia
	31	Sievanen, 2014	Mexico, Baja California
	32	Finkbeiner, 2015	Mexico, Baja California
	33	Bell et al., 2018	Pacific Island countries and territories
	34	Shaffril et al., 2020	Pacific Island countries and territories
	35	Le Cornu et al., 2018	Pacific Island countries and territories
	36	Hanich et al., 2018	Pacific Island countries and territories
	37	Jara et al., 2020	Peru
	38	Monnier et al., 2020	The Philippines
	39	Macusi et al., 2020	The Philippines
	40	Monnier et al., 2020	South Africa
	41	Gianelli et al., 2021	South America, Atlantic coast
	42	GIZ, 2019	South Pacific
	43	Cinner et al., 2018	Tropical coastal communities
	44	Aguilera et al., 2015	US, West coast
	45	GIZ, 2019	West Africa
	46	Ndhlovu et al., 2017	Zimbabwe
			Total	33	29	14	18	34
Table S2. List of the adaptation strategies and tools and their sources arranged according to Categories and Strategies.
Category	Strategy	Adaptation Tools	Sources
Institutional	Policies	· Public policies to deal with the impact of climate variability and change on the livelihoods of fishing communities	Islam & Chuenpagdee, 2022; Kalikoski et al., 2010
	Policies	· Improve governance & ensuring sustainable management	Bell et al., 2018; Hanich et al., 2018; Mabe & Asase, 2020; Monnier et al., 2020; Payne et al., 2021; Salagrama, 2012
	Policies	E.g. Sustainable use and protection of specific coastal habitats	Bell et al., 2018
	Policies	· Improve enforcement of maritime laws	Bell et al., 2018; Islam et al., 2014; Macusi et al., 2020
	Policies	· Support initiatives to reduce fishing effort in overexploited fisheries	Allison et al., 2009; IFAD, 2014
	Policies	· Support initiatives to reduce excess capacity	IFAD, 2014
	Policies	· Maximise the efficiency of spatial management	Bell et al., 2018
	Policies	· Transfer local fisheries policies into national fisheries management plans	GIZ, 2019
Institutional	Regulations	· Governance-led actions that increase the flexibility	Payne et al., 2021
	Regulations	· Flexible, adaptive institutions	Allison et al., 2009
	Regulations	· Flexible management measures, that allows for switching between adaptive responses	Cinner et al., 2018; Finkbeiner, 2015; Le Cornu et al., 2018
	Regulations	· Flexible management tools	Gianelli et al., 2021
	Regulations	· Spatial and temporal flexibility in fishing operations	Aguilera et al., 2015; FAO, 2018; GIZ, 2019; Le Cornu et al., 2018; Sievanen, 2014
	Regulations	· Flexibility in effort	Aguilera et al., 2015
	Regulations	· Flexibility with regard to harvesting and group size	Berkes & Armitage, 2010
	Regulations	· Ensuring continued flexibility in mobility	Berkes & Armitage, 2010; Sievanen, 2014
	Regulations	· Increase the power and freedom to respond to challenges	Cinner et al., 2018; Hanich et al., 2018; Payne et al., 2021
	Regulations	E.g. Improve fisheries management through bottom-up adaptive processes	Salagrama, 2012
Institutional	Obtaining external support	· Government assistance of social, economic, environmental, and institutional and organisational supports are required to strengthen the adaptation climate change	Islam & Chuenpagdee, 2022; Shaffril et al., 2020; Yuerlita et al., 2013
	Obtaining external support	· Support capacity building	Shaffril et al., 2013; Yuerlita et al., 2013
	Obtaining external support	· Support adoption	GIZ, 2019
	Obtaining external support	· Foster development of climate change action plans for coastal communities that take into account sustainable fisheries management, food security and livelihood adaptation (i.e. emerging economies, new community opportunities) and are based on reliable and available data sources	GIZ, 2019
	Obtaining external support	· Mitigating future impact	Allison et al., 2009
	Obtaining external support	· Restoring the health of ecosystems	IFAD, 2014; Monnier et al., 2020
	Obtaining external support	· To construct planned adaptation strategies such as managed retreat	Shaffril, Hamzah, et al., 2017
	Obtaining external support	· Reduce and/or sequester greenhouse gas emissions	IFAD, 2014
	Obtaining external support	· Support principles of fair governance based on legitimacy, equity, responsiveness and accountability	Gupta et al., 2010
	Obtaining external support	· Mobilise leadership qualities of social actors	Gupta et al., 2010
	Obtaining external support	· Address non-fisheries issues that affect fisheries resources and the quality of life of fishing communities	Salagrama, 2012
	Obtaining external support	· Address issues of migrant fishers	Salagrama, 2012
	Obtaining external support	· Foster marketing initiatives	Gianelli et al., 2021
	Obtaining external support	· Improve access to fish market	Islam et al., 2014
	Obtaining external support	· Providing government support in marketing fish products in overseas markets	Deb & Haque, 2016
	Obtaining external support	· Need for more policy support to try and increase both the quantities and types of fish eaten domestically	Prosperi et al., 2019
	Obtaining external support	· Increase availability of fish for urban populations - help maintain the traditionally high levels of fish consumption	Bell et al., 2018
	Obtaining external support	· Promote the health benefits of fish	Bell et al., 2018
	Obtaining external support	· Lessening consumption	Deb & Haque, 2016
	Obtaining external support	· Limit export of demersal fish	Bell et al., 2018
	Obtaining external support	· Allow for the costs of adaptation and the potential changes in economic contributions	Allison et al., 2009; Gupta et al., 2010
	Obtaining external support	· Financing mechanisms to limit community dependence on third parties that can have leverage during disruptions periods in the fishing activity	Jara et al., 2020
	Obtaining external support	· Financial support during no-fishing time	Deb & Haque, 2016; Finkbeiner, 2015; Kalikoski et al., 2010
	Obtaining external support	· Fixing fishing gear	Kalikoski et al., 2010
	Obtaining external support	· Subsidize prices of the fishing implements	Senapati & Gupta, 2017
	Obtaining external support	· Apply targeted subsidy programs to support key adaptations	Allison 2009, Bell 2018
Communication	Generating data: Information for institutions	· Support & improve the design, implementation and operation of reliable data collection, management and dissemination systems	Gianelli et al., 2021; GIZ, 2019
	Generating data: Information for institutions	· Better planning in face to variations occurring in the resources based on monitoring oceanographic changes	Jara et al., 2020
	Generating data: Information for institutions	· Recognition: Place-specific nature (rootedness), which recognizes the situated nature of resilience and the importance of culture and place, including the focus on identity, worldviews, and attachment	Brown, 2015
Communication	Improving access to knowledge: Information for people	· Continuous learning through knowledge co-production	Armitage et al., 2011; Cinner et al., 2018; Dale and Armitage, 2011
	Improving access to knowledge: Information for people	· Increase the ability to learn	Gupta et al., 2010; Payne et al., 2021
	Improving access to knowledge: Information for people	· Access to knowledge	Shaffril et al., 2013; Shaffril, Hamzah, et al., 2017
	Improving access to knowledge: Information for people	· Strengthen fishermen's (and other stakeholders) climate change knowledge	Abu Samah et al., 2016; Cinner et al., 2018; GIZ, 2019; IFAD, 2014; Islam & Chuenpagdee, 2022; Monnier et al., 2020; Muhammad et al., 2016; Shaffril, Abu Samah, et al., 2017
	Improving access to knowledge: Information for people	· Increase awareness among fishing communities and other stakeholders	Hasan & Nursey-Bray, 2018; Monnier et al., 2020; Salagrama, 2012; Shaffril et al., 2013
	Improving access to knowledge: Information for people	E.g. Enhancing disaster awareness and understand their perception of risks	Iwasaki et al., 2009; Shaffril, Hamzah, et al., 2017
	Improving access to knowledge: Information for people	E.g. Lack of terms for the key concepts of climate change and adaptation in local languages	Hasan & Nursey-Bray, 2018
	Improving access to knowledge: Information for people	· Integrate the knowledge into regional and national strategies and institutions / organisations that acknowledge the linkages and the risks of climate-related human migration	Finkbeiner, 2015; GIZ, 2019; Shaffril et al., 2020
	Improving access to knowledge: Information for people	· Address issues of sea safety	IFAD, 2014; Salagrama, 2012; Shaffril, Abu Samah, et al., 2017
	Improving access to knowledge: Information for people	· Better training to respond to the warnings	León et al., 2006
	Improving access to knowledge: Information for people	· Detailed environmental knowledge and skills on the land	Berkes & Armitage, 2010
	Improving access to knowledge: Information for people	· Better communication from government agencies especially about the rules and regulations	Islam & Chuenpagdee 2022
	Improving access to knowledge: Information for people	· Research information sharing and information dissemination programmes should be intensified	Shaffril et al., 2013
Communication	Promoting collective action	· Strengthening social relationships, including family support	Fauzi & Anna, 2010; Iwasaki et al., 2009; Shaffril, Abu Samah, et al., 2017
	Promoting collective action	· Sense of unity among the local people	Iwasaki et al., 2009
	Promoting collective action	· Social capital linking	Gianelli et al., 2021
	Promoting collective action	· Establish networks between science, fisheries management, NGOs, and local communities that promote sharing of knowledge	Berkes & Armitage, 2010; Cinner et al., 2018; Finkbeiner, 2015; Gianelli et al., 2021; GIZ, 2019; Iwasaki et al., 2009
	Promoting collective action	· Promote association/cooperation	Gianelli et al., 2021
	Promoting collective action	· Enable cooperation and collective action	Cinner et al., 2018
	Promoting collective action	E.g. Community services, work sharing in repairing gear and equipment	Fauzi & Anna, 2010
	Promoting collective action	· Establish natural resource co-management regimes involving community groups and fishers and fish farmers associations	Bell et al., 2018; Berkes & Armitage, 2010; Galappaththi et al., 2021; Gianelli et al., 2021; GIZ, 2019; IFAD, 2014; Islam & Chuenpagdee, 2022; Jara et al., 2020; Le Cornu et al., 2018; Schipper et al., 2014
	Promoting collective action	· Increase the degree of self-organization	Gupta et al., 2010; Kalikoski et al., 2010; Ndhlovu et al., 2017; Payne et al., 2021
	Promoting collective action	· Create fishers’ assembly	Gianelli et al., 2021
	Promoting collective action	· Fishers as a whole can collectively resist the pressures	Deb & Haque, 2016
Communication	Promoting inclusivity and participation	· Developing more participative structures (as well in consultation processes, decision-making, policymaking and research processes) and fisheries councils	Gianelli et al., 2021; Gupta et al., 2010; Islam & Chuenpagdee, 2022; Jara et al., 2020; Kalikoski et al., 2010; Monnier et al., 2020; Salagrama, 2012; Shaffril, Abu Samah, et al., 2017
	Promoting inclusivity and participation	E.g. Including the design and use of sustainable fishing gears	Jara et al., 2020
	Promoting inclusivity and participation	· Increase the community voices being heard at the local and national levels (lack possibly due to poor literacy, low socio-economic status and lack of influential community leaders)	Hasan & Nursey-Bray, 2018
	Promoting inclusivity and participation	· Elect fishery leaders	Gianelli et al., 2021
	Promoting inclusivity and participation	· Letters of agreement	Gianelli et al., 2021
Science	Improving scientific models	· An oceanographic observation and forecasting modeling system for fishery planning prior to resources changes	Jara et al., 2020
	Improving scientific models	· Better and more effective monitoring, control and surveillance (e.g. promote new digital technologies to improve cost-effectiveness of data acquisition and analysis)	GIZ, 2019; Jara et al., 2020; Monnier et al., 2020
	Improving scientific models	· Data collection improvement	Gianelli et al., 2021
	Improving scientific models	· Include monitoring of pollution and treatment of wastewater, such as fishmeal effluents	Jara et al., 2020
	Improving scientific models	· More research on fisheries resources	Fauzi & Anna, 2010; Monnier et al., 2020
	Improving scientific models	· Development of research on fisheries adaptation to climate change	Monnier et al., 2020
	Improving scientific models	· Strengthen knowledge and understanding of the linkages between climate change and small-scale fisheries	GIZ, 2019
	Improving scientific models	· Reduce the uncertainties associated with climate change and its impacts	FAO, 2018
	Improving scientific models	· Cross-sectorial and trans-disciplinary studies are necessary	Islam & Chuenpagdee, 2022
	Improving scientific models	· Multi-disciplinary research for diversified, supplementary and alternative livelihood opportunities for fishing communities including new technologies and industries	GIZ, 2019
	Improving scientific models	· More community adaptation studies	Abu Samah et al., 2019
	Improving scientific models	· Participatory action research	Shaffril et al., 2013
	Improving scientific models	· Implement a more holistic approach, such as the ecosystem approach to the management of fisheries and aquaculture (including ICZM, MPAs, coastal habitats and fish stocks)	Bell et al., 2018; IFAD, 2014; Iwasaki et al., 2009
	Improving scientific models	· Integrate fishery resources into a watershed perspective	Iwasaki et al., 2009
Science	Technical innovations	· Aquaculture innovation: genetic improvement programmes	Allison et al., 2009
	Technical innovations	· Develop/identify new commercially viable strains of aquaculture species tolerant of low water quality, high temperatures and disease	IFAD, 2014
	Technical innovations	· Converting aquaculture and fishing residues into agricultural fertilizers using bacterial consortia	Jara et al., 2020
Risk resilience	Avoiding impacts	· Develop preparedness plans	IFAD, 2014; Salagrama, 2012
	Avoiding impacts	· Develop a disaster risk management toolkit	Monnier et al., 2020
	Avoiding impacts	· Improve seasonal weather forecasts, cyclone forecast and radio signalling	Allison et al., 2009; IFAD, 2014; Islam et al., 2014; Jara et al., 2020
	Avoiding impacts	· Develop an early warning systems	Allison et al., 2009; IFAD, 2014
	Avoiding impacts	· Disaster recovery programmes	Allison et al., 2009
	Avoiding impacts	· HABs warning system	Gianelli et al., 2021
	Avoiding impacts	· Special recognition of the fishing villages as ‘disaster prone’ and ‘seasonally food deficit’ zones	Deb & Haque, 2016
	Avoiding impacts	· Protection using structural and non-structural options	Shaffril, Hamzah, et al., 2017
	Avoiding impacts	· Rehabilitate coastal ecosystems that provide protection from storms and waves (access carbon finance for mangrove planting and/or restoration), e.g. mangroves, wetlands, marshes, and coral or artificial reefs	Bell et al., 2018; IFAD, 2014; Monnier et al., 2020; Muhammad et al., 2016
	Avoiding impacts	· Provide for landward migration of mangrove habitats	Bell et al., 2018
Risk resilience	Improving individual and community well-being	· Improved access to education	Abu Samah et al., 2016; Monnier et al., 2020; Shaffril et al., 2013
	Improving individual and community well-being	· Improve access to decent housing & rural infrastructure	Islam & Chuenpagdee, 2022; Salagrama, 2012; Shaffril, Hamzah, et al., 2017
	Improving individual and community well-being	· Improve access to basic services (e.g. health care)	Cinner et al., 2018; Salagrama, 2012
	Improving individual and community well-being	· Introducing food aid program for the most vulnerable section (widows, deserted women, physically weak persons, etc.)	Deb & Haque, 2016
	Improving individual and community well-being	· Improved access to the environment	Finkbeiner, 2015
	Improving individual and community well-being	E.g. Legal recognition of the fishing labor force, and a redistribution of permits among fishing cooperatives and permit holders	Finkbeiner, 2015
	Improving individual and community well-being	· Children working: Eradication of racial discrimination: lack of choice for children to work in fisheries due to lack of money and racial/cast discrimination which creates an obstacle to continue to high school	Iwasaki et al., 2009
Livelihood	Improving catch value	· Technological innovation: Developing new fishing, storage, transport and processing technologies	Allison et al., 2009; Payne et al., 2021
	Improving catch value	· Improve the quality of fish products	Monnier et al., 2020
	Improving catch value	· Extend the shelf life of fish catches	Bell et al., 2018
	Improving catch value	· Reduce the cost of fishing	Islam et al., 2014
	Improving catch value	· Better commercialisation	Monnier et al., 2020
	Improving catch value	· Improvements in post-harvest processing	GIZ 2019, IFAD, 2014
	Improving catch value	· Adopt new processing technology	Gianelli et al., 2021
	Improving catch value	· Establishing multi-species processing at local facilities	Aguilera et al., 2015
	Improving catch value	E.g. Diversify and strengthen the economic added value of artisanal fishery products, for example using dried anchovy to promote direct human consumption	Jara et al., 2020
	Improving catch value	E.g. Converting aquaculture and fishing residues into agricultural fertilizers using bacterial consortia.	Jara et al., 2020
	Improving catch value	· Food sovereignty (e.g. not selling to a middlemen who can control the prices of the fish)	Monnier et al., 2020; Kalikoski et al., 2010
	Improving catch value	· Interact with chefs	Gianelli et al., 2021
	Improving catch value	· Strengthen the economic added value of artisanal fishery products (e.g. shortening the value chain by selling fish at higher prices directly to restaurants)	FAO, 2018; Jara et al., 2020; Monnier et al., 2020; Prosperi et al., 2019
	Improving catch value	· Access to technology	Abu Samah et al., 2016; Cinner et al., 2018; Shaffril et al., 2013; Shaffril, Hamzah, et al., 2017
Livelihood	Switching focus (species)	· Support and facilitate diversification of target species	Aguilera et al., 2015; Allison et al., 2009; Bell et al., 2018; Coulthard, 2008; FAO, 2018; Fauzi & Anna, 2010; Gianelli et al., 2021; GIZ, 2019; Monnier et al., 2020; Senapati & Gupta, 2017
	Switching focus (species)	· Promote access to fish species that are not / less caught	Bell et al., 2018
	Switching focus (species)	E.g. Promoting access through less expensive permits	Aguilera et al., 2015
	Switching focus (species)	E.g. Promote through less stringent regulation to multiple fisheries of an interconnected system	Aguilera et al., 2015
	Switching focus (species)	· New appearance of invasive species	Monnier et al., 2020
	Switching focus (species)	E.g. Selling fish that are not included in quota restrictions	Prosperi et al., 2019
	Switching focus (species)	· Transfer some effort, access rights and revenues from specific industrial fisheries to small-scale fisheries	Bell et al., 2018
Livelihood	Switching focus (gear)	· Support and facilitate diversification of fishing gear	Aguilera et al., 2015; Allison et al., 2009; FAO, 2018; Fauzi & Anna, 2010; Gianelli et al., 2021; GIZ, 2019; Senapati & Gupta, 2017
	Switching focus (gear)	E.g. Encourage the use of static fishing gear instead of damaging towed gear such as trawls.	IFAD, 2014
	Switching focus (gear)	E.g. Assessing the relevance of existing regulations on net mesh size, developing new ones	Yuerlita et al., 2013
	Switching focus (gear)	· The implementation of modern technologies and the use of efficient fishing gear and equipment	IFAD, 2014; Islam et al., 2014; Monnier et al., 2020; Salagrama, 2012
	Switching focus (gear)	· Introduce more fuel-efficient boats	IFAD 2014, Salagrama 2012
Livelihood	Switching focus (livelihood)	· Encourage diversification of livelihoods and income sources, including activities that are outside the fisheries sector, not related to fishing and aquaculture.	Allison et al., 2009; Bell et al., 2018; Coulthard, 2008; FAO, 2018; Fauzi & Anna, 2010; Gianelli et al., 2021; IFAD, 2014; Islam et al., 2014; Islam & Chuenpagdee, 2022; Jara et al., 2020; Kalikoski et al., 2010; Leite et al., 2019; Macusi et al., 2020; Monnier et al., 2020; Ndhlovu et al., 2017; Payne et al., 2021; Prosperi et al., 2019; Shaffril et al., 2013, 2020; Sievanen, 2014; Yuerlita et …
		Examples:
	Switching focus (livelihood)	• Working on industrial fishing vessels, exploring fresh water resources, and having alternative sources of income from agriculture and other temporary jobs	Kalikoski et al., 2010
	Switching focus (livelihood)	• Ecotourism	Bell et al., 2018; Jara et al., 2020
	Switching focus (livelihood)	• Pescatourism	Prosperi et al., 2019
	Switching focus (livelihood)	• Sustainable aquaculture (e.g., scallops or mussels)	IFAD, 2014; Jara et al., 2020; Muhammad et al., 2016
	Switching focus (livelihood)	• Improve aquaculture development planning and zoning.	IFAD, 2014
	Switching focus (livelihood)	• Encourage establishment of small-scale fish nurseries to facilitate restocking after disasters.	IFAD, 2014
	Switching focus (livelihood)	• Expansion of small pond aquaculture to increase access to fish for inland communities	Bell et al., 2018
	Switching focus (livelihood)	• Promote integrated aquaculture and agriculture systems, including using flooded/saline land and water bodies.	IFAD, 2014
	Switching focus (livelihood)	• Promote the culture of low-trophic-level species and aquatic plants in polyculture/Integrated Multi-Trophic Aquaculture systems	IFAD, 2014
	Switching focus (livelihood)	• Create new market opportunities and support and facilitate diversification of market chains	Allison et al., 2009; Gianelli et al., 2021
	Switching focus (livelihood)	• Employing more family labor	Deb & Haque, 2016
	Switching focus (livelihood)	• Involvement in national livestock programs	Ndhlovu et al., 2017
	Switching focus (livelihood)	• Coconut farming	Macusi et al., 2020
	Switching focus (livelihood)	• Rice farming	Macusi et al., 2020
	Switching focus (livelihood)	• Jasmin tea farming	Fauzi & Anna, 2010
	Switching focus (livelihood)	• Driving motorcycle	Macusi et al., 2020
	Switching focus (livelihood)	• Short-term construction labor	Macusi et al., 2020
	Switching focus (livelihood)	• Boat financing	Macusi et al., 2020
	Switching focus (livelihood)	• Diversification into other businesses	Macusi et al., 2020
	Switching focus (livelihood)	· Facilitating the community's learning of alternative skills	Abu Samah et al., 2016; Shaffril, Abu Samah, et al., 2017; Shaffril, Hamzah, et al., 2017; Yuerlita et al., 2013
	Switching focus (livelihood)	· Introduce transformative measures that allow fishermen to sustain livelihoods through alternative sources of income	GIZ, 2019
	Switching focus (livelihood)	· Promote livelihood diversification through consultative processes.	Salagrama, 2012
	Switching focus (livelihood)	· Taking special initiatives for accommodating unemployed and underemployed groups in labor-intensive industries (e.g., garments and shrimp processing).	Deb & Haque, 2016
	Switching focus (livelihood)	· Periodical assessment of fishermen readiness to diversify their technology skills and knowledge	Shaffril, Hamzah, et al., 2017
Livelihood	Access to finances	· Insurance	FAO, 2018; GIZ, 2019; IFAD, 2014; Islam et al., 2014; Jara et al., 2020; Ndhlovu et al., 2017; Senapati & Gupta, 2017
	Access to finances	E.g. Natural calamity insurance or disaster insurance to cover loss of fishing gear	Iwasaki et al., 2009
	Access to finances	· Microfinance	Allison et al., 2009; FAO, 2018
	Access to finances	· Better access to credit	Cinner et al., 2018; Deb & Haque, 2016; FAO, 2018; Haque et al., 2015; IFAD, 2014; Islam et al., 2014; Iwasaki et al., 2009; Macusi et al., 2020; Shaffril, Abu Samah, et al., 2017
		Credit needs of small-fishers, who are vulnerable to asset loss due to uncertainty in fish catches, need to be addressed in innovative new credit arrangements.
		The formal credit system should be reformed to meet the needsof small-fishers, taking into account the uncertainty of the fish catch, lack of collateral and co-signers, and the need for flexibility
		Access to credit that enables fishers to invest in other sectors such as tourism would reduce pressure on fish stocks while providing for livelihood diversification
	Access to finances	· Financial support in forms of loans and loan waivers --> Strategic loan financial scheme for fishing gears and education expense	Finkbeiner, 2015; Iwasaki et al., 2009
	Access to finances	· Investments	FAO, 2018; Finkbeiner, 2015
	Access to finances	E.g. Invest in key infrastructure	IFAD, 2014
	Access to finances	E.g. Invest in climate resilient infrastructure	Iwasaki et al., 2009
	Access to finances	· Identify opportunities to access carbon finance for mangrove planting and/or restoration.	IFAD, 2014
Figure S1. Time-support analysis of the results from each participant group from the Mexican sticky-note exercise. The amount of support needed for the implementation of the tools and actions is shown on the x-axis and the amount of time needed on the y-axis.
Each dot represents an adaptation tool indicated as important for the respective group displaying the amount of time and support needed to implement this tool as considered by the participant.
The colours represent the categories (dark blue – Institutional, turquoise – Communication, orange – Risk Resilience, green – Livelihood, and yellow – Science)
and the coloured fields represent where each category is represented on the overall time-support diagram. Overlapping points are shown side-by side for visualisation purposes.
This plot is derived from the Time-support framework as shown in Fig. 2 in the main manuscript.
